# Supplementary material
Source: Royal Society of Chemistry journal article supplement (doi:10.1039/d6ta00425c)
Supplement: d6ta00425c1.pdf [file d6ta00425c1.pdf]

Supplementary Information for

**A Universal Magnetic Alignment Strategy for Composite Solid-state  
electrolytes with Vertically Aligned High-Ionic-Conductivity  
Pathways**

Hui Ding<sup>a</sup>, Wen He<sup>a</sup>, Haoqing Tian<sup>a</sup>, Shuo Liu<sup>a</sup>, Wensheng Yang<sup>\*a,b</sup>

<sup>a</sup>State Key Laboratory of Chemical Resource Engineering, Beijing University of  
Chemical Technology, Beijing 100029, P. R. China

<sup>b</sup>Quzhou Institute for Innovation in Resource Chemical Engineering, No. 78, Jiuhuabei  
Avenue, Quzhou City, Zhejiang Province 324000, P. R. China

\* Corresponding author. E-mail: yangws@mail.buct.edu.cn (Wensheng Yang)

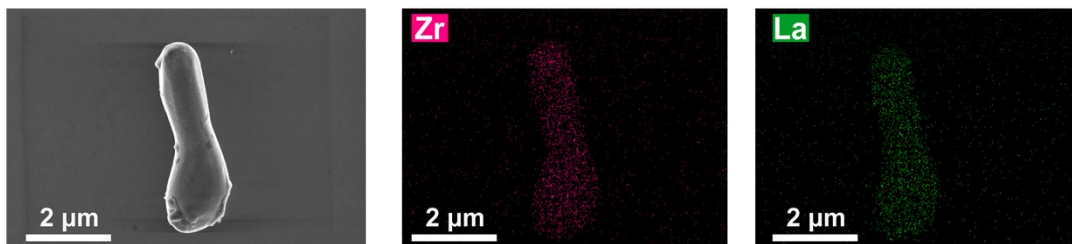

Fig. S1. SEM image and EDS elemental mappings of Zr and La for an individual LLZO.

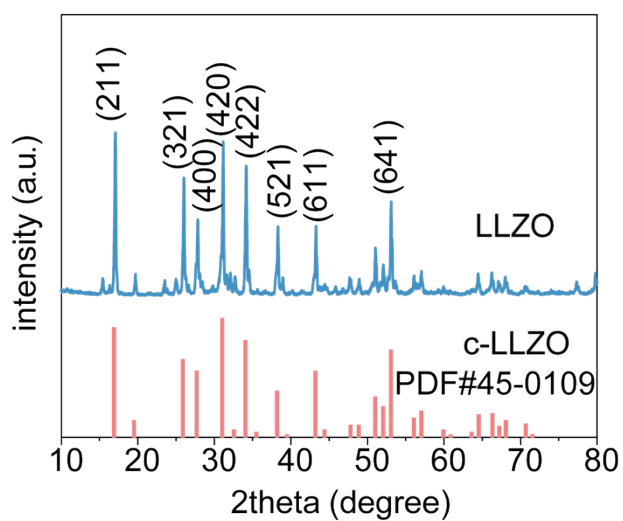

Fig. S2. X-Ray Diffraction (XRD) patterns of the cubic- $\text{Li}_7\text{La}_3\text{Zr}_2\text{O}_{12}$  (LLZO) nanoparticles. The XRD pattern of LLZO shows characteristic peaks that match well with the standard card for cubic LLZO. The measurement was performed from  $10^\circ$  to  $80^\circ$  ( $2\theta$ ) at a scanning rate of  $10^\circ\cdot\text{min}^{-1}$ .

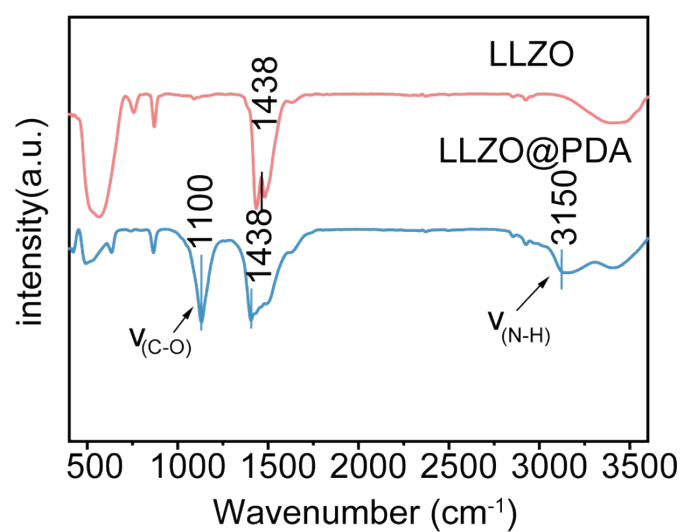

Fig. S3. Fourier Transform infrared spectroscopy (FT-IR) of LLZO without and with PDA coating. The FT-IR spectrum of coated LLZO shows characteristic peaks of PDA at  $1100\text{ cm}^{-1}$  (C–O) and  $3150\text{ cm}^{-1}$  (N–H).

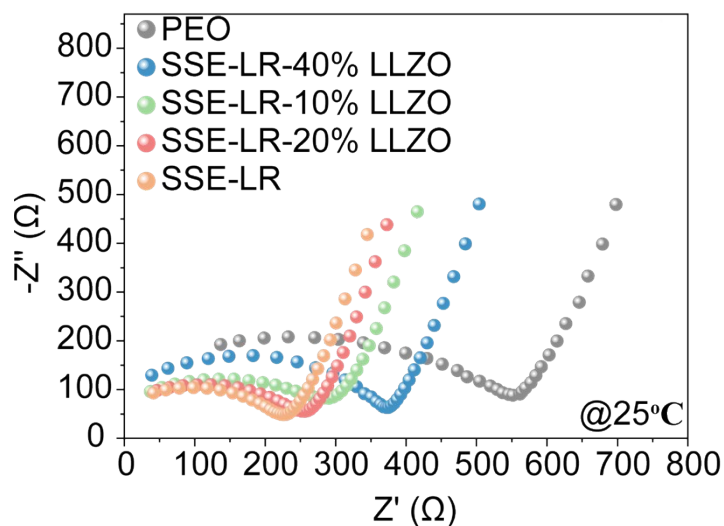

Fig. S4. Nyquist plots for samples containing 10–40 wt.% LLZO@PDA (relative to the PEO matrix). The sample with 30 wt.% LLZO@PDA is denoted as SSE-LR. The ionic conductivities of the LLZO@PDA/PEO composite solid-state electrolytes with LLZO@PDA contents ranging from 10 to 40 wt.% were calculated using the formula  $\sigma = L/(R \cdot S)$  ( $R$  is impedance value;  $L$  is membrane thickness;  $S$  is membrane area).

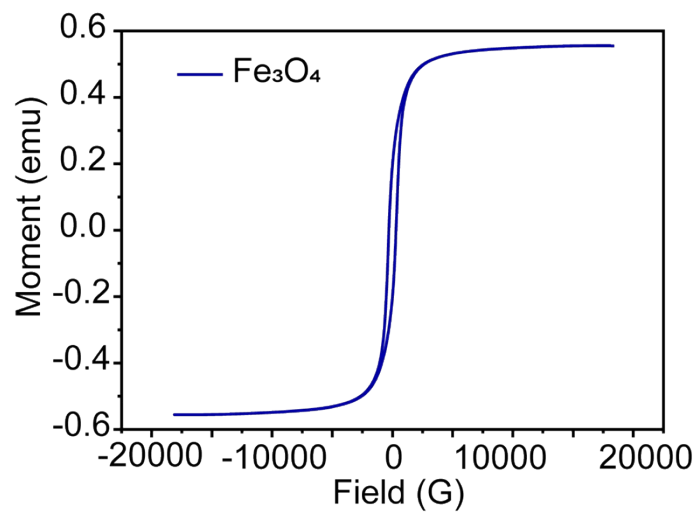

Fig. S5. Vibrating Sample Magnetometer curve of the Fe<sub>3</sub>O<sub>4</sub> nanorods. The saturation magnetization ( $M_s$ ) was calculated to be 92.5 emu·g<sup>-1</sup> from the measured magnetic moment and a 6 mg sample mass.

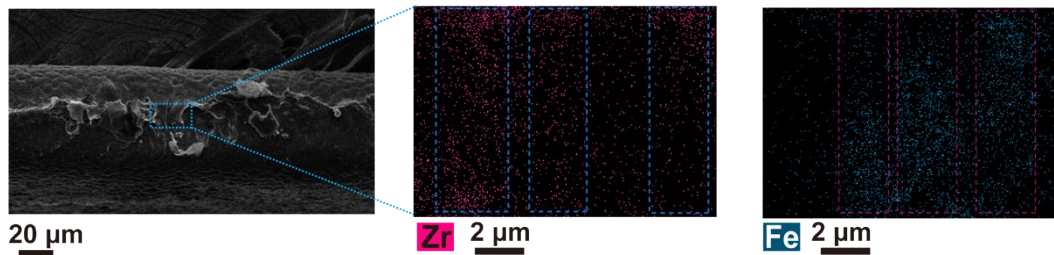

Fig. S6. Cross-sectional SEM and elemental mappings of the SSEM-LV membrane after being kept at 60 °C for 24 h.

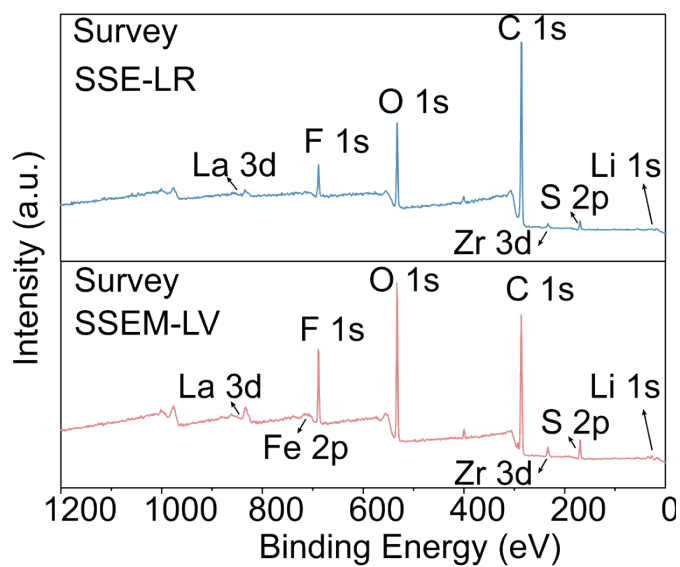

Fig. S7. XPS survey of SSE-LR and SSEM-LV.

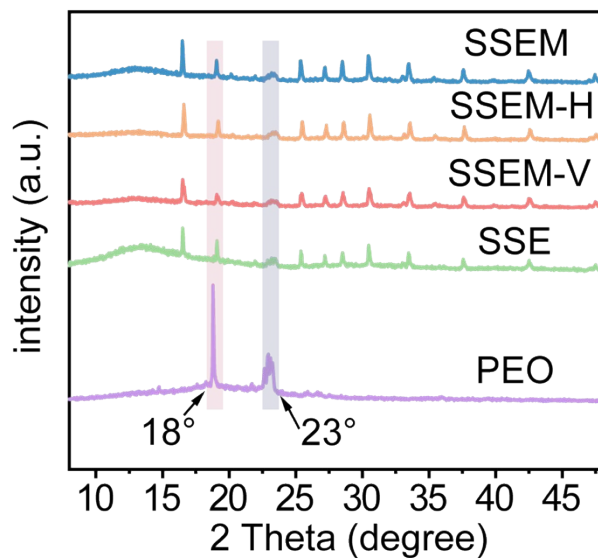

Fig. S8. XRD pattern of SSEM-LV, SSEM-LR, SSEM-LH, SSE-LR and PEO. The XRD patterns were collected from  $10^{\circ}$  to  $80^{\circ}$  ( $2\theta$ ) at a scan rate of  $10^{\circ}\cdot\text{min}^{-1}$ . The decreased intensity of the characteristic peaks compared to pure PEO suggests that the crystallization of the PEO polymer matrix was suppressed by the incorporation of LLZO@PDA and  $\text{Fe}_3\text{O}_4$ .

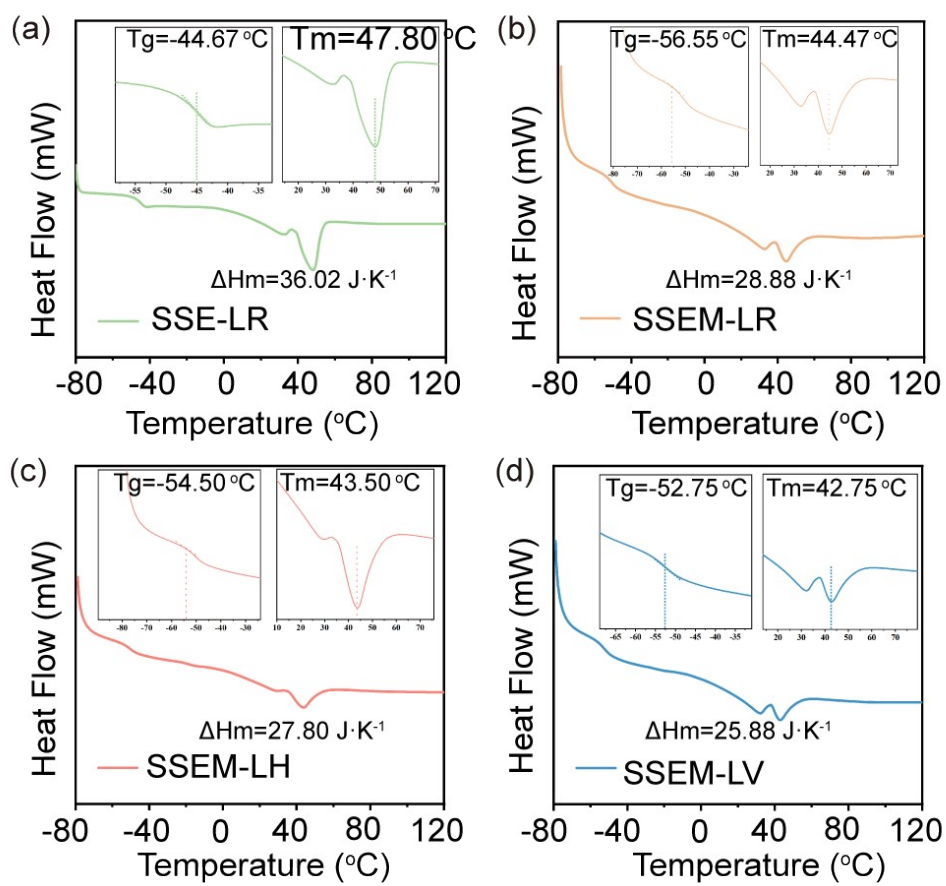

Fig. S9. Differential Scanning Calorimetry (DSC) curves of (a) SSE-LR, (b) SSEM-LR, (c) SSEM-LH and (d) SSEM-LV. DSC was employed to characterize the phase transition behavior of each electrolyte. The crystallinity ( $\chi_c$ ) of the four electrolytes was calculated according to  $\chi_c = \Delta H_m / (\Delta H_{PEO} \cdot f_{PEO}) \cdot 100\%$ , where  $\Delta H_m$  is the melting enthalpy of the membrane,  $\Delta H_{PEO}$  is the melting enthalpy of fully crystalline PEO, which is  $196.4 \text{ J} \cdot \text{g}^{-1}$ , and  $f_{PEO}$  is the weight fraction of PEO in the electrolyte sample (Sustainable Energy & Fuels, 2023, 7, 1645-1655).

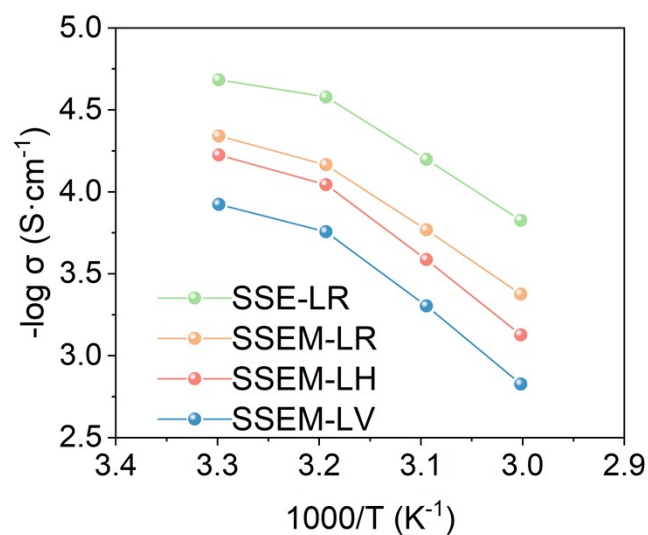

Fig. S10. Arrhenius plots of ionic conductivity for SSE-LR, SSEM-LR, SSEM-LV and SSEM-LH. SSEM-LV exhibits the highest ionic conductivity from 30 to 60 °C; For instance, at 60 °C, the ionic conductivities of SSEM-LV, SSEM-LR, SSEM-LH and SSE-LR are  $12.9 \times 10^{-4} \text{ S}\cdot\text{cm}^{-1}$ ,  $6.6 \times 10^{-4} \text{ S}\cdot\text{cm}^{-1}$ ,  $4.6 \times 10^{-4} \text{ S}\cdot\text{cm}^{-1}$ ,  $1.0 \times 10^{-4} \text{ S}\cdot\text{cm}^{-1}$ , respectively.

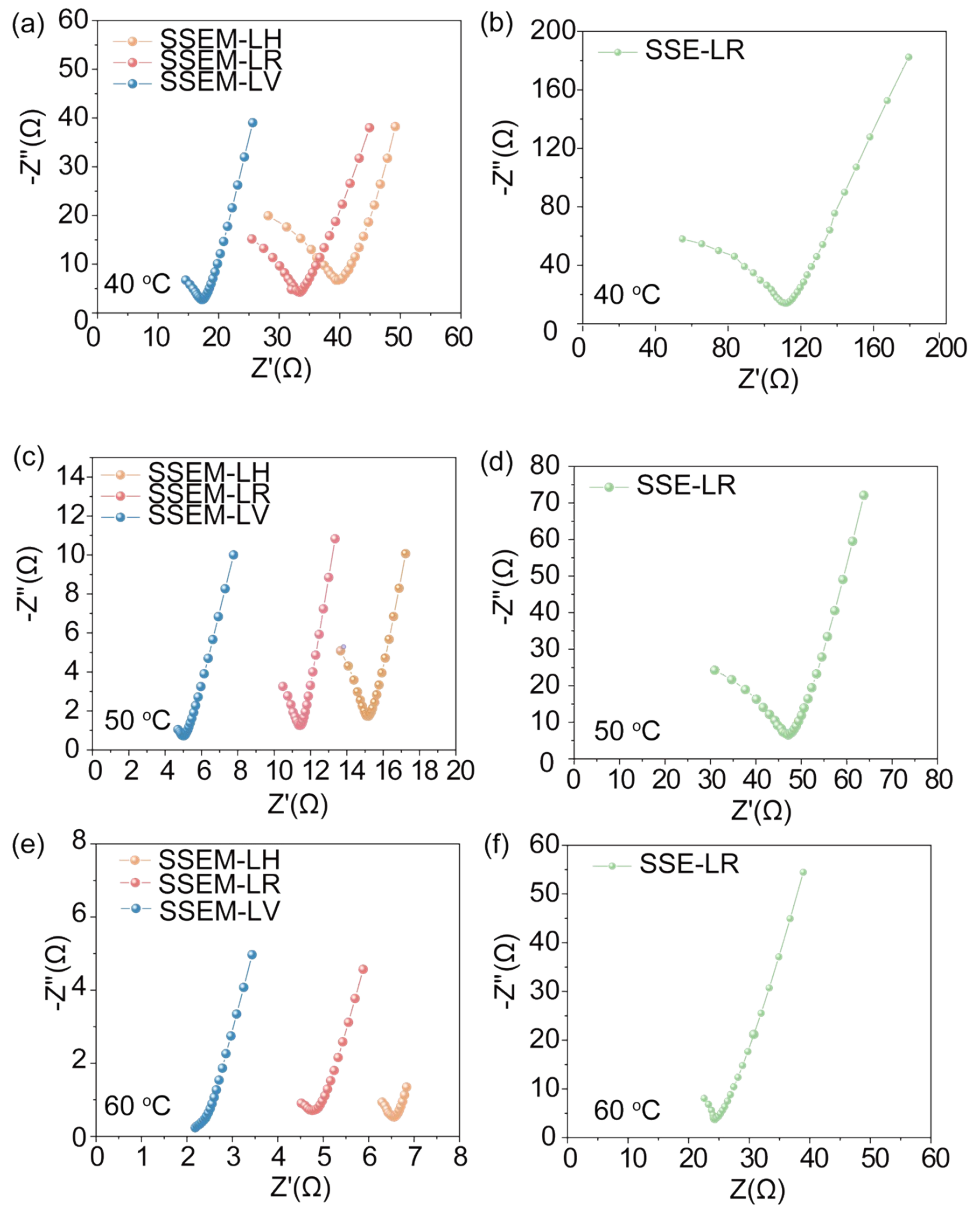

Fig. S11. Nyquist plots of SSE-LR, SSEM-LR, SSEM-LV and SSEM-LH at 40, 50, and 60 °C.

**Table S1.** Ionic conductivity ( $\times 10^{-4} \text{ S}\cdot\text{cm}^{-1}$ ) of SSE-LR, SSEM-LR, SSEM-LV and SSEM-LH at 30, 40, 50 and 60 °C

| Sample  | 30 °C | 40 °C | 50 °C | 60 °C |
|---------|-------|-------|-------|-------|
| SSEM-LV | 1.20  | 1.70  | 7.40  | 12.9  |
| SSEM-LR | 0.55  | 0.90  | 1.80  | 4.60  |
| SSEM-LH | 0.46  | 0.74  | 2.60  | 6.60  |
| SSE-LR  | 0.21  | 0.26  | 0.64  | 1.00  |

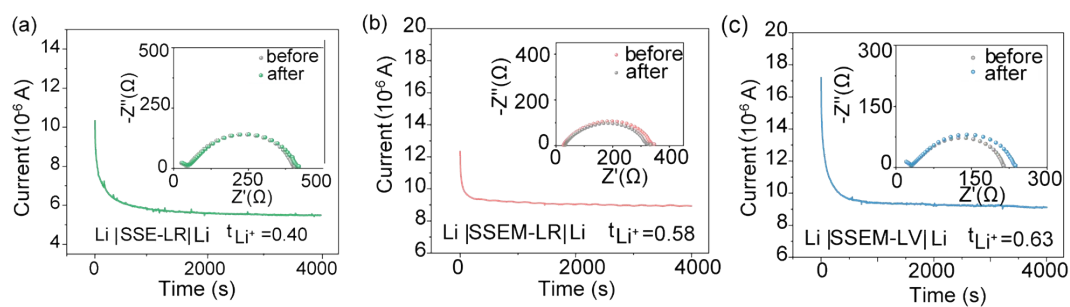

Fig. S12. I-t curves of SSE-LR, SSEM-LR and SSEM-LV (inset: impedance plots before and after the I-t test).

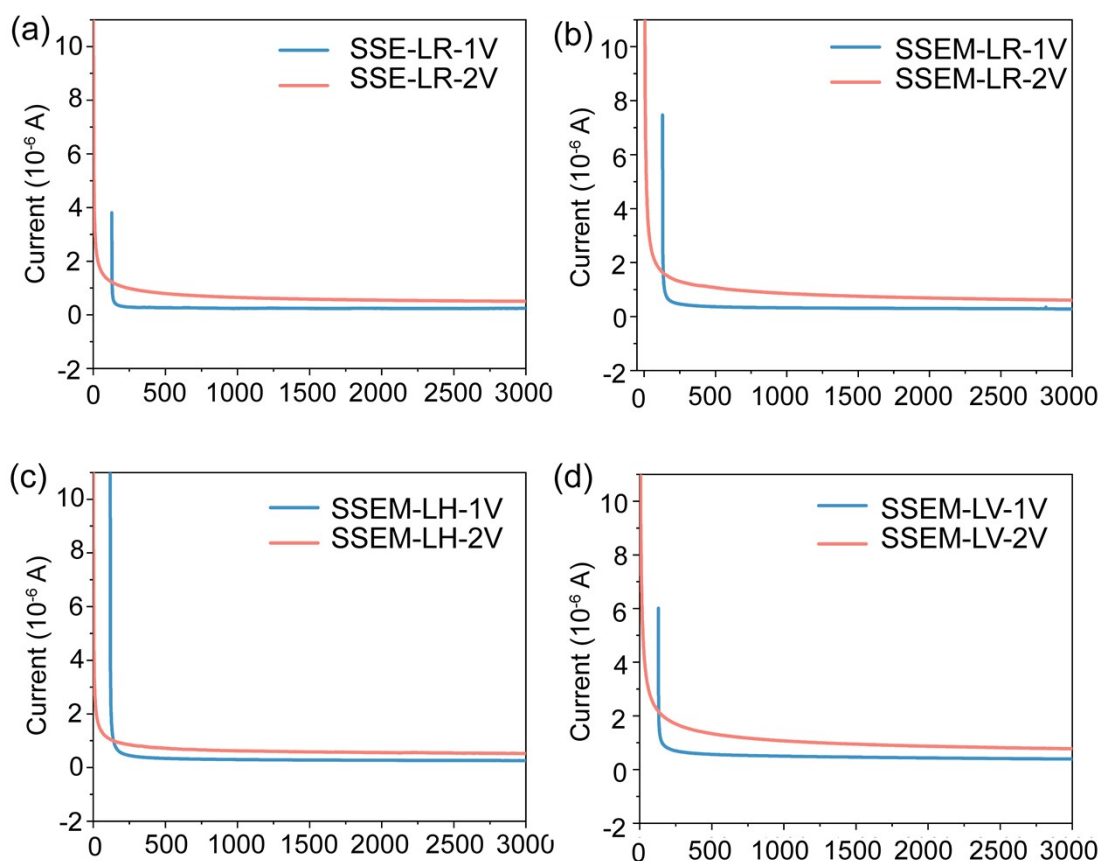

Fig. S13. Chronoamperometry (*i*-*t*) curves of (a) SSE-LR (b) SSEM-LR (c) SSEM-LH and (d) SSEM-LV measured at 60°C. The electronic conductivities of the composite electrolytes were evaluated via DC polarization measurements using an ion-blocking configuration (SS|electrolyte|SS) (Nature Energy, 2019, 4, 187–196). Upon the application of a constant DC voltage, the current initially decayed rapidly due to the ion-blocking effect of the stainless steel electrodes and eventually stabilized. This steady-state current is attributed solely to electron migration. Calculated from the steady-state currents, the electronic conductivities of SSE-LR, SSEM-LR, SSEM-LH, and SSEM-LV are  $7.43 \times 10^{-10} \text{ S} \cdot \text{cm}^{-1}$ ,  $8.12 \times 10^{-10} \text{ S} \cdot \text{cm}^{-1}$ ,  $7.77 \times 10^{-10} \text{ S} \cdot \text{cm}^{-1}$ ,  $11.2 \times 10^{-10} \text{ S} \cdot \text{cm}^{-1}$ , respectively.

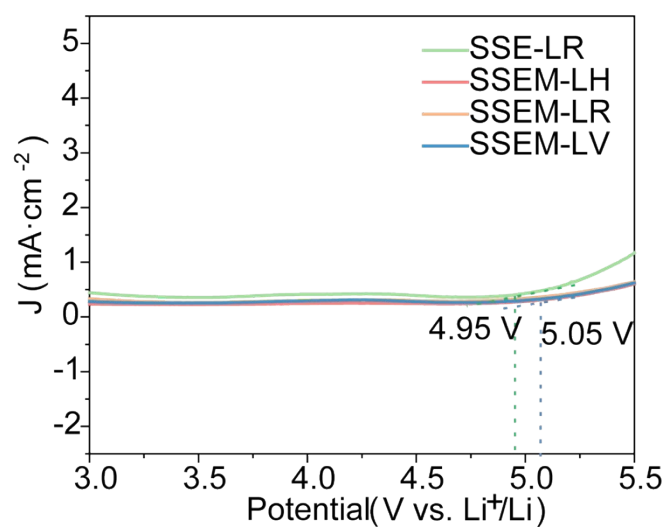

Fig. S14. Linear sweep voltammetry (LSV) curves of SSEM-LV, SSEM-LR, SSEM-LH and SSE-LR, measured using an SS||Li cell at a scan rate of  $5 \text{ mV}\cdot\text{s}^{-1}$  over a potential range of 3.0–5.5 V (vs.  $\text{Li}^+/\text{Li}$ ).

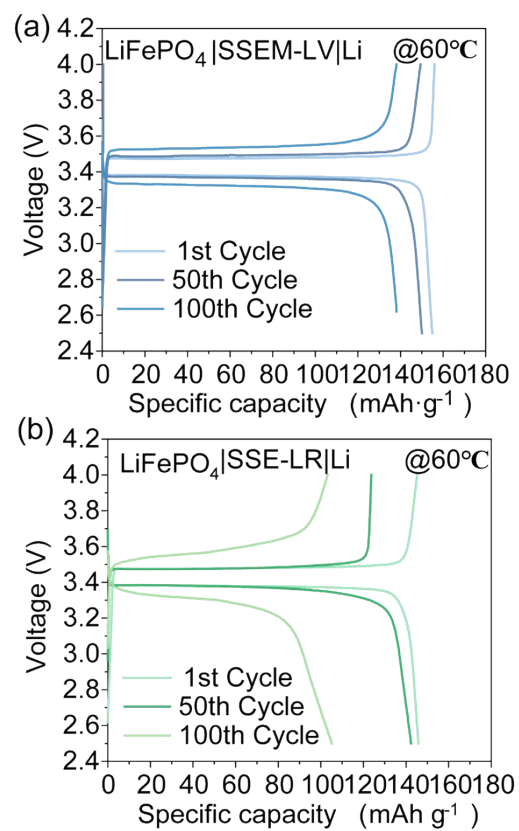

Fig. S15. Charge and discharge curves of  $\text{LiFePO}_4|\text{Li}$  cells with (a) SSEM-LV and (b) SSE-LR at selected cycle numbers. Tests were performed at 60 °C and 0.1 C over a voltage range of 2.5-4.0 V (vs.  $\text{Li}^+/\text{Li}$ ).

**Table S2** Comparison of electrochemical performances and loading of LFP in literatures

| Ionic conductivity ( $10^{-4} \text{ S}\cdot\text{cm}^{-1}$ ) | Lithium anode stability                                      | LFP-Li cell Specific capacity                                       | Loading of LFP ( $\text{mg}\cdot\text{cm}^{-2}$ ) | Journals                                                    |
|---------------------------------------------------------------|--------------------------------------------------------------|---------------------------------------------------------------------|---------------------------------------------------|-------------------------------------------------------------|
| 0.48 (30 °C)                                                  | 0.1mA $\cdot\text{cm}^{-2}$<br>480h                          | LFP, 0.1C<br>140.4<br>mAh $\cdot\text{g}^{-1}$                      | ---                                               | Journal of Colloid and Interface Science 565 (2020) 110–118 |
| 4.4 (60 °C)                                                   | 0.05mA $\cdot\text{cm}^{-2}$<br>600h                         | LFP, 4C, 121<br>mAh $\cdot\text{g}^{-1}$                            | 1.0                                               | Rare Met. 42, 875–884 (2023)                                |
| 2.1 (60 °C)                                                   | 0.1 mA $\cdot\text{cm}^{-2}$<br>350h                         | LFP, 0.1C 121<br>mAh $\cdot\text{g}^{-1}$                           | 3.2                                               | Journal of Energy Chemistry 70 (2022) 363–372               |
| 1.15 (30 °C)                                                  | 0.2 mA $\cdot\text{cm}^{-2}$<br>400h                         | LFP, 0.2C 147<br>mAh $\cdot\text{g}^{-1}$                           | ----                                              | J. Mater. Chem. A, 2019,7, 16425-16436                      |
| 0.85 (60 °C)                                                  | 0.1 mA $\cdot\text{cm}^{-2}$<br>800h                         | LFP, 0.2C 120<br>mAh $\cdot\text{g}^{-1}$                           | 1.0                                               | Chemical Engineering Journal 524 (2025) 169042              |
| 0.43 (30 °C)                                                  | 0.05mA $\cdot\text{cm}^{-2}$<br>1000h                        | LFP, 0.1C 150<br>mAh $\cdot\text{g}^{-1}$                           | 1.1                                               | Chemical Engineering Journal 429 (2022) 132343              |
| 0.31 (30 °C)                                                  | 0.2 mA $\cdot\text{cm}^{-2}$<br>280h                         | ---                                                                 | ----                                              | Energy Storage Materials 28 (2020) 293–299                  |
| 1.39 (30 °C)                                                  | 0.1 mA $\cdot\text{cm}^{-2}$<br>120h                         | LFP, 0.1C 140<br>mAh $\cdot\text{g}^{-1}$                           | 2.2                                               | Adv. Sci. 2018, 5, 1700996                                  |
| 0.32 (30 °C)                                                  | ----                                                         | LFP, 0.1C 125<br>mAh $\cdot\text{g}^{-1}$                           | ----                                              | Electrochimica Acta 389 (2021) 138747                       |
| <b>1.20 (30 °C)</b><br><b>12.9 (60 °C)</b>                    | <b>0.05mA<math>\cdot\text{cm}^{-2}</math></b><br><b>700h</b> | <b>LFP, 0.1C 155.9</b><br><b>mAh<math>\cdot\text{g}^{-1}</math></b> | <b>3.57</b>                                       | <b>This work</b>                                            |

As detailed in **Table S2**, SSEM-LV demonstrates the following specific parameters: i) Ionic conductivities of  $1.2\times 10^{-4} \text{ S}\cdot\text{cm}^{-1}$  at 30 °C and  $12.9\times 10^{-4} \text{ S}\cdot\text{cm}^{-1}$  at 60 °C. The value at 60 °C is higher than those of the other references listed in the table. ii) The LFP||Li cell delivers a specific capacity of 155.9 mAh $\cdot\text{g}^{-1}$  at 0.1C, which is the highest

value among the compared references. iii) The LFP loading in our work is  $3.57 \text{ mg} \cdot \text{cm}^{-2}$ , which is higher than the referenced values. iv) SSEM-LV exhibits a stable cycle life of 700 h at  $0.05 \text{ mA} \cdot \text{cm}^{-2}$ , which is comparable to that reported in the existing literature.
